# Supplementary material
Source: publisher figshare collection journal article supplement (https://acs.figshare.com/ndownloader/files/4487800)
Supplement: Supplementary file 1 [file 4487800]

## Supporting Information:

### Phase Behavior and Crystalline Phases of Ionic Liquid-Lithium Salt Mixtures with 1-Alkyl-3-methylimidazolium Salts

Qian Zhou, Kendall Fitzgerald, Paul D. Boyle, and Wesley A. Henderson\*

*Ionic Liquid & Electrolytes for Energy Technologies (ILEET) Laboratory, Department of Chemical & Biomolecular Engineering, North Carolina State University, Raleigh, NC 27695*

#### Experimental Details:

**NMR Measurements.** All NMR spectra were measured at room temperature on a Varian Gemini 200 MHz spectrometer. Deuterated acetonitrile ( $\text{CD}_3\text{CN}$ , 99.8 atom% D, containing 1% v/v TMS) was used as the solvent (Fig. S-1).  $^1\text{H}$  NMR data for the clear, colorless  $\text{IM}_{10\text{R}}\text{TFSI}$  (Table S-1 and Fig. S-2) salts indicate that the ILs are all of high purity (>99%).

**IL-LiX Crystal Structures.** Fig. S-3 shows two views of a portion of the polymeric ionic chains formed in the 1/1 ( $x = 0.50$ )  $\text{IM}_{101}\text{CF}_3\text{SO}_3/\text{LiCF}_3\text{SO}_3$  crystalline phase by the  $\text{Li}^+$  cations and  $\text{CF}_3\text{SO}_3^-$  anions. Each anion coordinates two  $\text{Li}^+$  cations. The third anion oxygen atom forms a single hydrogen bond with one of the neighboring  $\text{IM}_{102}^+$  cations. The  $\text{Li}^+$  cations are coordinated by a total of four anion oxygen atoms (one each from four anions). The  $\text{IM}_{102}^+$  cations reside between the polymeric ionic chains.

Fig. S-4 shows two views of a portion of the ionic planar sheets formed in the 1/2 ( $x = 0.67$ )  $\text{IM}_{102}\text{TFSI}/\text{LiTFSI}$  crystalline phase by the  $\text{Li}^+$  cations and TFSI anions. Each anion coordinates either two or three  $\text{Li}^+$  cations. The anions have either  $C_2$  or  $C_1$  symmetry<sup>3-7</sup> with twice as many of the latter present. The anions with  $C_1$  symmetry are the ones coordinated to three  $\text{Li}^+$  cations. The  $\text{Li}^+$  cations are coordinated by five anion oxygens. The  $\text{IM}_{102}^+$  cations reside in cavities formed by these sheets. The  $\text{Li}^+$  cation coordination to the anions in this structure is shown in Fig. S-5.

- (1) Burba, C. M.; Rocher, N. M.; Frech, R.; Powell, D. R. *J. Phys. Chem. B* **2008**, *112*, 2991.
- (2) Matsumoto, K.; Hagiwara, R.; Tamada, O. *Solid State Sciences* **2006**, *8*, 1103.
- (3) Foropoulos Jr., J.; DesMarteau, D. D. *Inorg. Chem.* **1984**, *23*, 3720.
- (4) Arnaud, R.; Benrabah, D.; Sanchez, J.-Y. *J. Phys. Chem.* **1996**, *100*, 10882.
- (5) Johansson, P.; Gejji, S. P.; Tegenfeldt, J.; Lindgren, J. *Electrochim. Acta* **1998**, *43*, 1375.
- (6) Holbrey, J. D.; Reichert, W. M.; Rogers, R. D. *Dalton Trans.* **2004**, 2267.
- (7) Rey, I.; Johansson, P.; Lindgren, J.; Lassègues, J. C.; Servant, L. *J. Phys. Chem. A* **1998**, *102*, 3249.

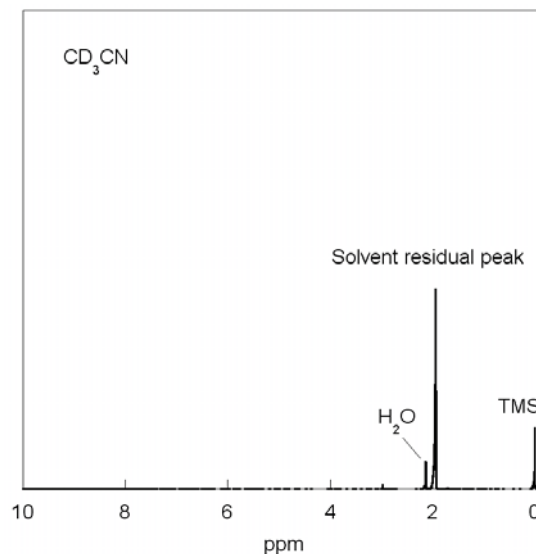

Figure S-1.  $^1\text{H}$  NMR spectrum for  $\text{CD}_3\text{CN}$ .

Table S-1.  $^1\text{H}$  NMR data for  $\text{IM}_{10\text{R}}\text{TFSI}$  ( $R = 1, 2$  or  $4$ ),  $\delta_{\text{H}}$  (200 MHz,  $\text{CD}_3\text{CN}$ ).

|                              |                                                                                                                     |
|------------------------------|---------------------------------------------------------------------------------------------------------------------|
| $\text{IM}_{101}\text{TFSI}$ | 8.37 (s, 1H), 7.32 (d, 2H), 3.82 (s, 6H)                                                                            |
| $\text{IM}_{102}\text{TFSI}$ | 8.40 (s, 1H), 7.38 (s, 1H), 7.32 (s, 1H), 4.16 (q, 2H), 3.81 (s, 3H), 1.45 (t, 3H)                                  |
| $\text{IM}_{104}\text{TFSI}$ | 8.42 (s, 1H), 7.38 (t, 1H), 7.34 (t, 1H), 4.13 (t, 2H), 3.83 (s, 3H), 1.79 (qnt, 2H), 1.32 (sext, 2H), 0.94 (t, 3H) |

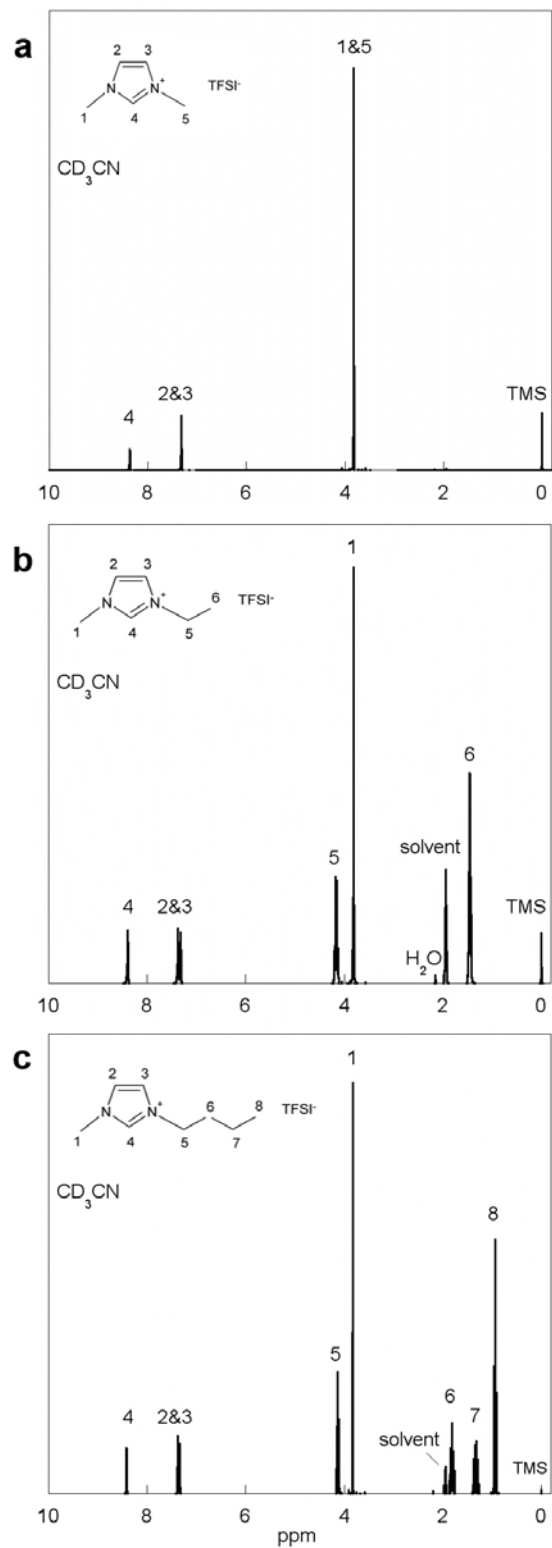

**Figure S-2.**  $^1\text{H}$  NMR spectrum for  $\text{IM}_{10\text{R}}$  TFSI (a)  $\text{R} = 1$ , (b)  $\text{R} = 2$  and (c)  $\text{R} = 4$ .

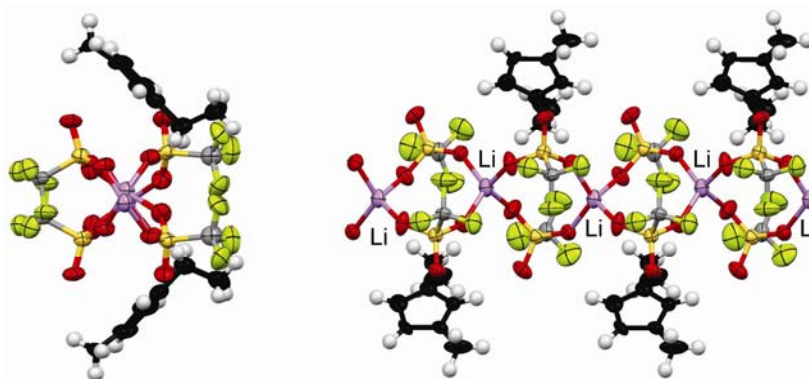

**Figure S-3.** Portion of the crystal structure of the 1/1 ( $x = 0.50$ )  $\text{IM}_{101}\text{CF}_3\text{SO}_3/\text{LiCF}_3\text{SO}_3$  crystalline phase (two views—rotated  $90^\circ$ ).<sup>1</sup> The C and N atoms of the  $\text{IM}_{102}^+$  cations are colored black for clarity (Li-purple, O-red, S-yellow, F-green).

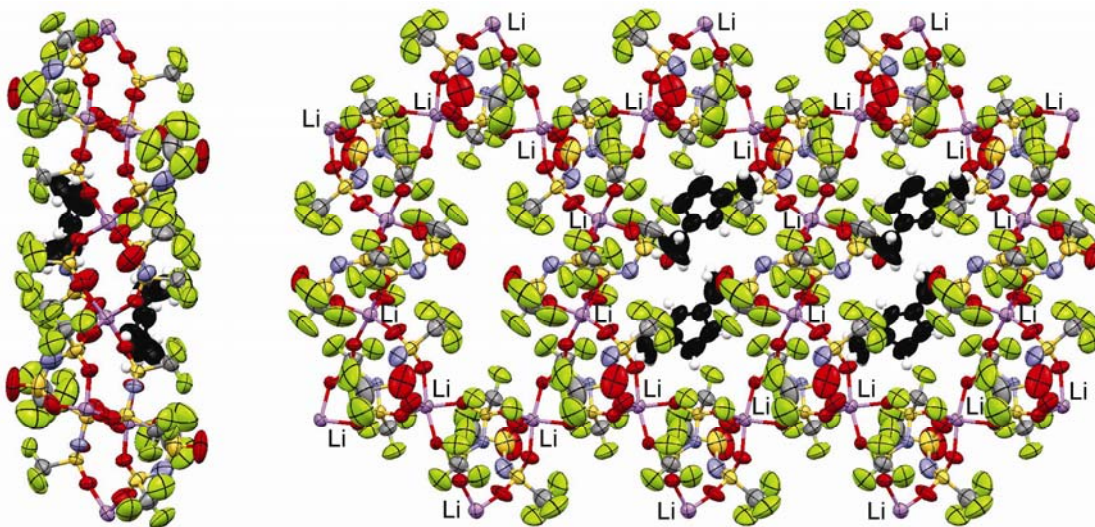

**Figure S-4.** Portion of the crystal structure of the 1/2 ( $x = 0.67$ )  $\text{IM}_{102}\text{TFSI}/\text{LiTFSI}$  crystalline phase (two views—rotated  $90^\circ$ ).<sup>2</sup> The C and N atoms of the  $\text{IM}_{102}^+$  cations are colored black and the two cations have been removed from the left cavity for clarity (Li-purple, O-red, S-yellow, F-green).

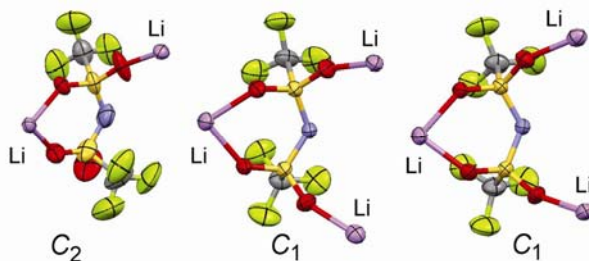

**Figure S-5.**  $\text{Li}^+ \dots \text{TFSI}^-$  coordination in the 1/2 ( $x = 0.67$ )  $\text{IM}_{102}\text{TFSI}/\text{LiTFSI}$  crystalline phase. The asymmetric unit contains two anions each with this coordination (6 total) (Li-purple, O-red, S-yellow, F-green).
